# Supplementary material for: The Search for an Interesting Partner to Combine with PD-L1 Blockade in Mesothelioma: Focus on TIM-3 and LAG-3
Source: PubMed Central journal article supplement (PMC7838786; doi:10.3390/cancers13020282), 2021-01-14

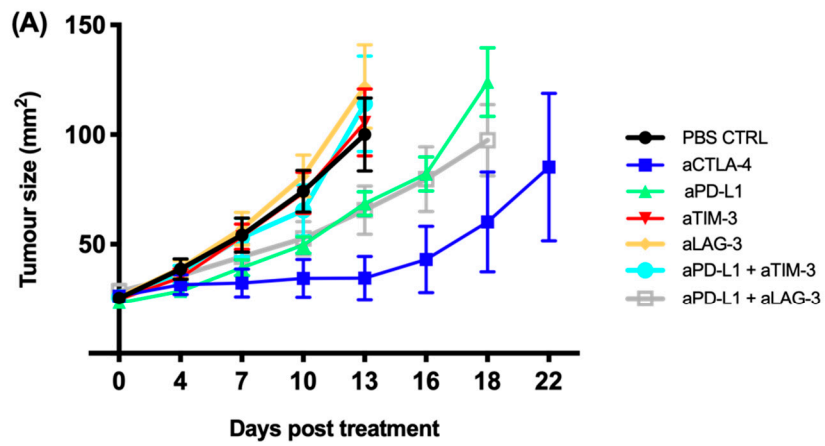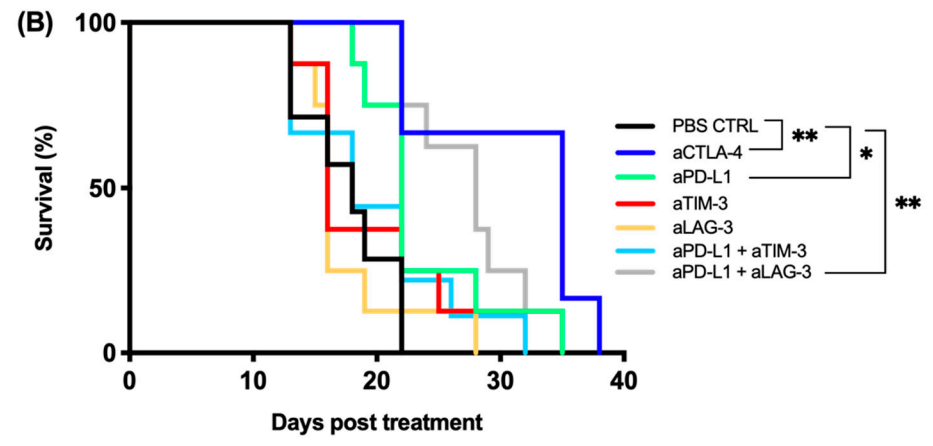

Supplement: cancers-13-00282-s001.pdf [file cancers-13-00282-s001.pdf]
